# Supplementary material
Source: PubMed Central journal article supplement (PMC7416749)

Figure S1

**A**

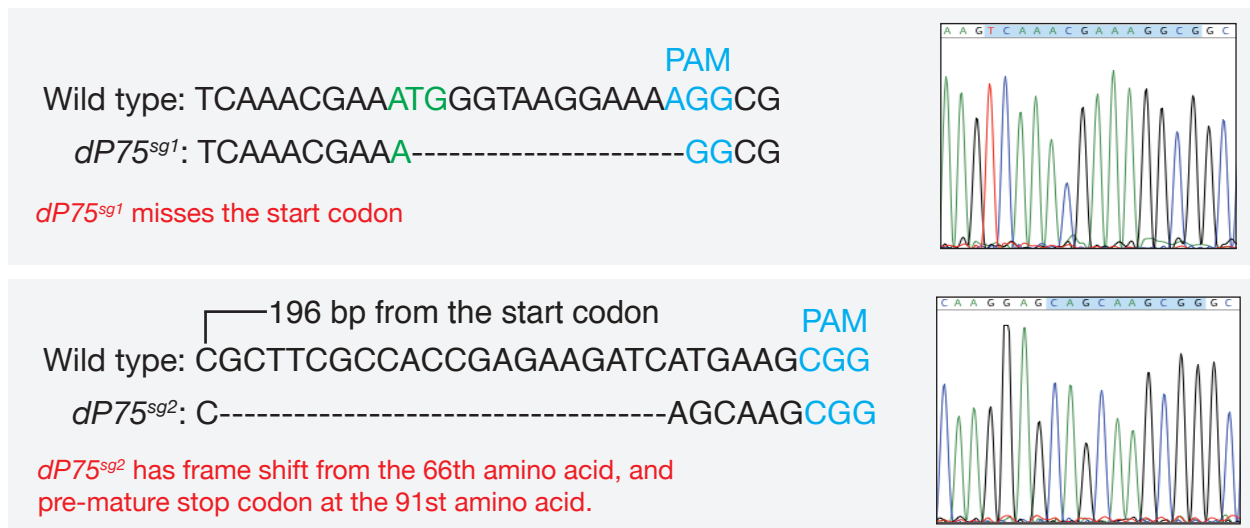

**B**

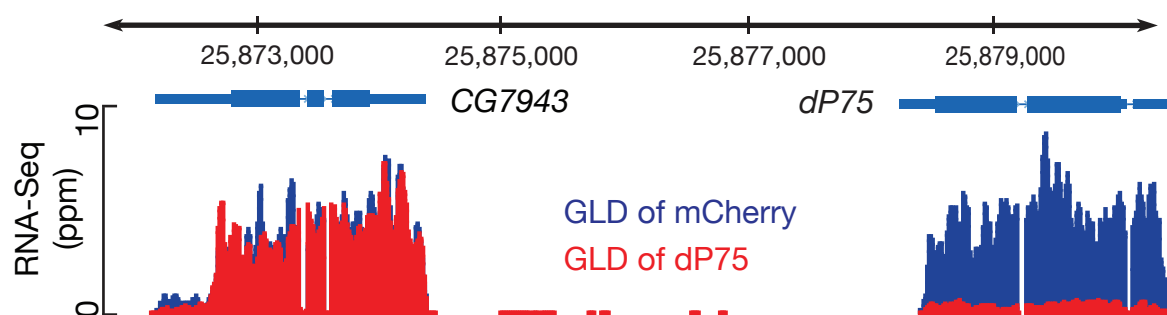

**C**

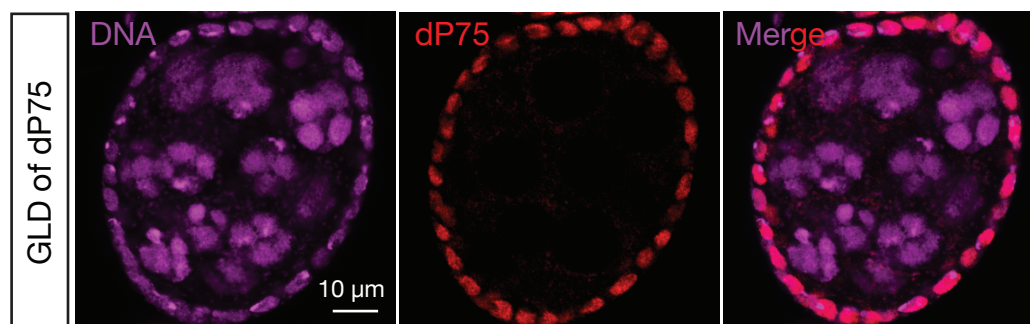

**D**

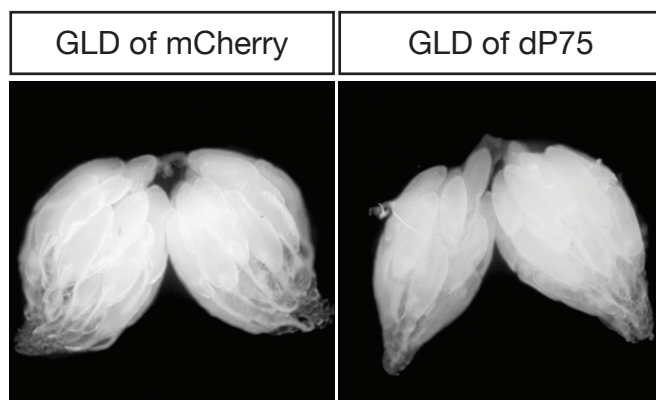

**E**

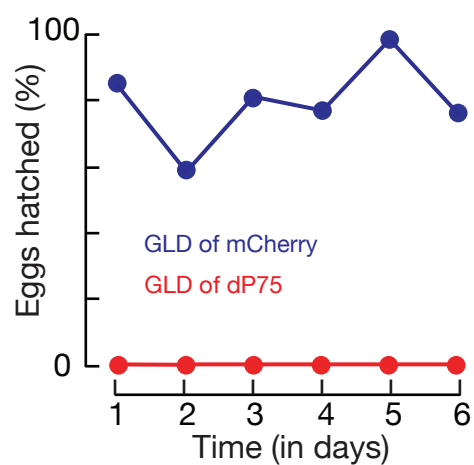

Supplement: NIHMS1577628-supplement-1.pdf [file NIHMS1577628-supplement-1.pdf]

Figure S2

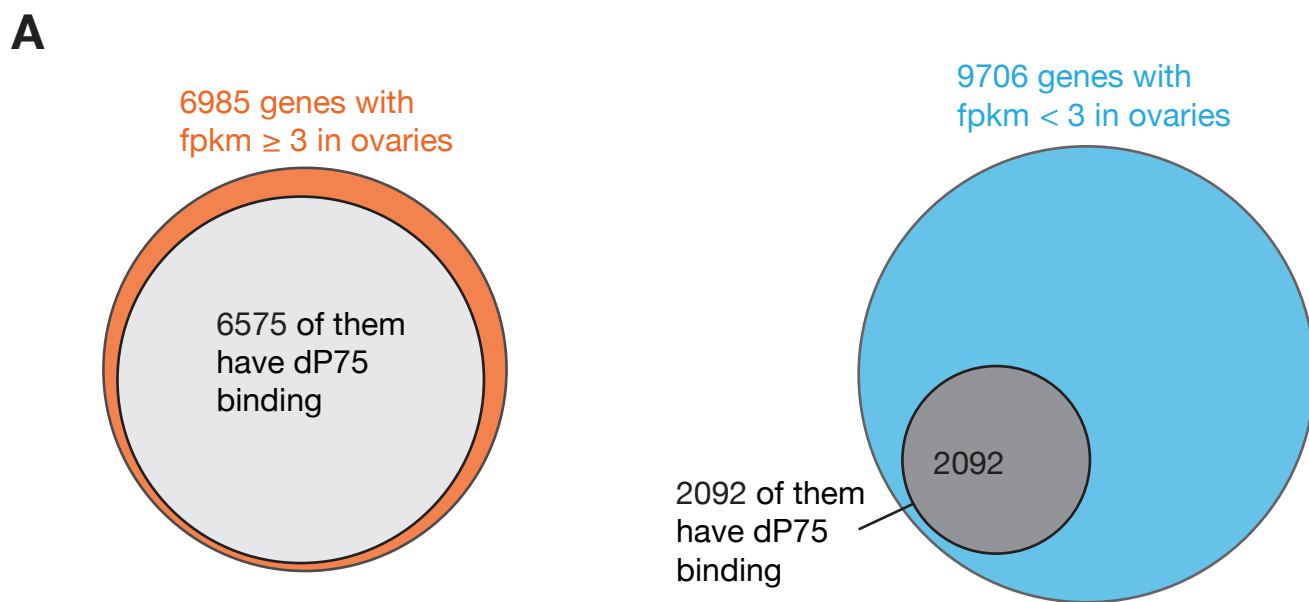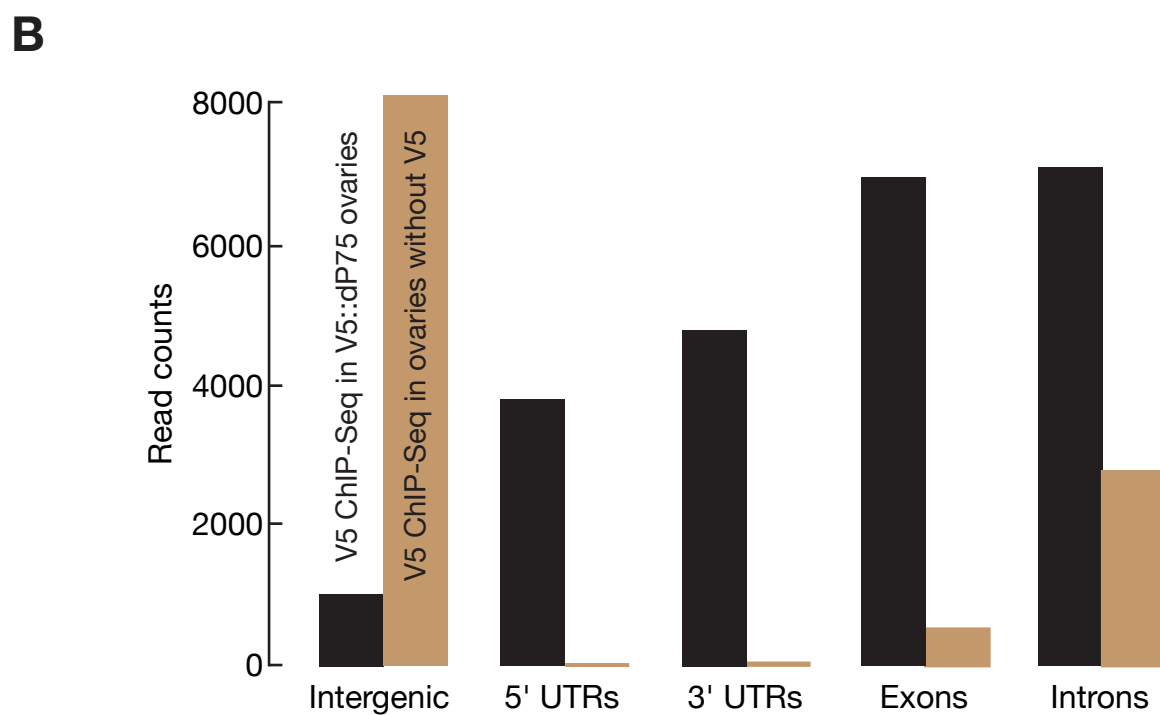

Supplement: NIHMS1577628-supplement-2.pdf [file NIHMS1577628-supplement-2.pdf]

Figure S3

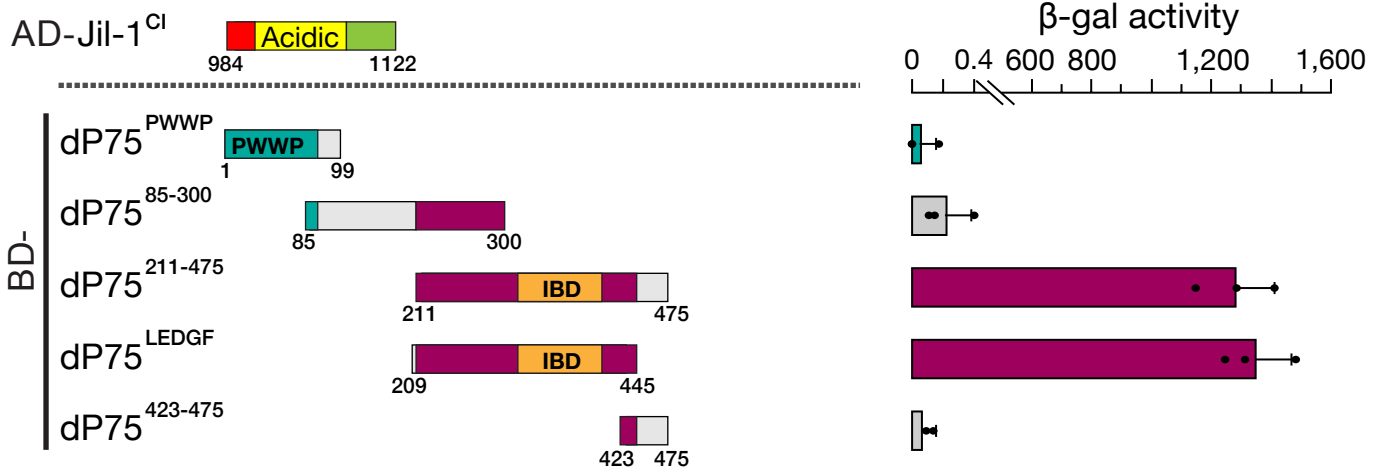

Supplement: NIHMS1577628-supplement-3.pdf [file NIHMS1577628-supplement-3.pdf]

Figure S6

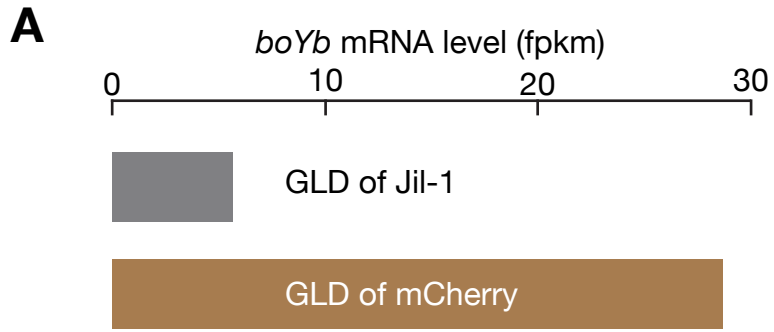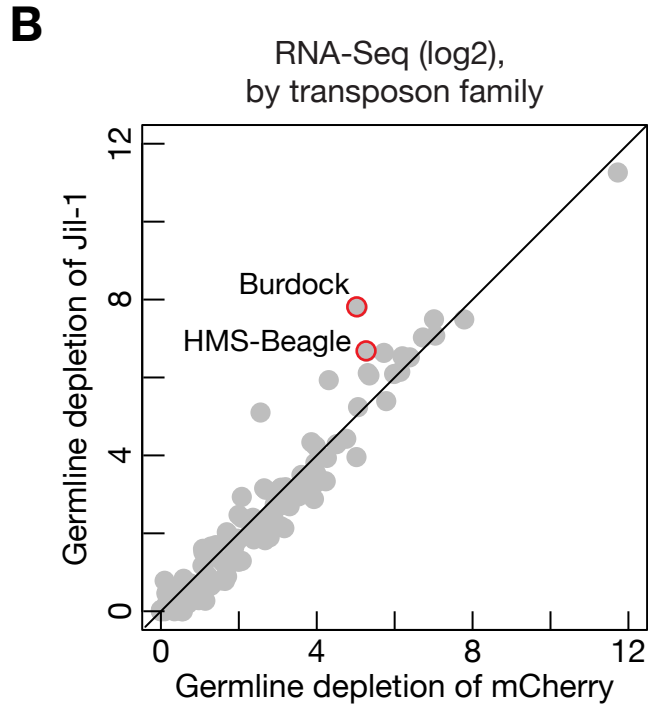

Supplement: NIHMS1577628-supplement-6.pdf [file NIHMS1577628-supplement-6.pdf]
